# Supplementary material for: A core–shell superparamagnetic metal–organic framework: a recyclable and green catalyst for the synthesis of propargylamines
Source: Royal Society of Chemistry journal article supplement (doi:10.1039/d1nj03703j), 2021-01-01
Supplement: d1nj03703j1.pdf [file d1nj03703j1.pdf]

## Supplementary data

# Core–Shell Superparamagnetic Metal Organic Framework: A Recyclable and Green Catalyst for the Synthesis of Propargylamines

Elham Arefi, Amir Khojastehnezhad, and Ali Shiri\*

*Department of Chemistry, Faculty of Science, Ferdowsi University of Mashhad, Mashhad, Iran*

*E-mail: [alishiri@um.ac.ir](mailto:alishiri@um.ac.ir)*

| <b>Table of Content</b>                                                                        | <b>Page Number</b> |
|------------------------------------------------------------------------------------------------|--------------------|
| Particle size distribution diagram of Fe <sub>3</sub> O <sub>4</sub> @MOF                      | 2                  |
| Elemental mapping of Fe <sub>3</sub> O <sub>4</sub> @MOF                                       | 3                  |
| EDX patterns of (a) Fe <sub>3</sub> O <sub>4</sub> and (b) Fe <sub>3</sub> O <sub>4</sub> @MOF | 4                  |
| Nitrogen adsorption-desorption isotherms of bare Fe <sub>3</sub> O <sub>4</sub>                | 5                  |
| Nitrogen adsorption-desorption isotherms of bare Fe <sub>3</sub> O <sub>4</sub> @HKUST-1       | 6                  |
| Hot filtration test diagram                                                                    | 7                  |
| FT-IR and NMR data                                                                             | 8                  |
| Original sepectrums of FT-IR and NMR                                                           | 9-23               |

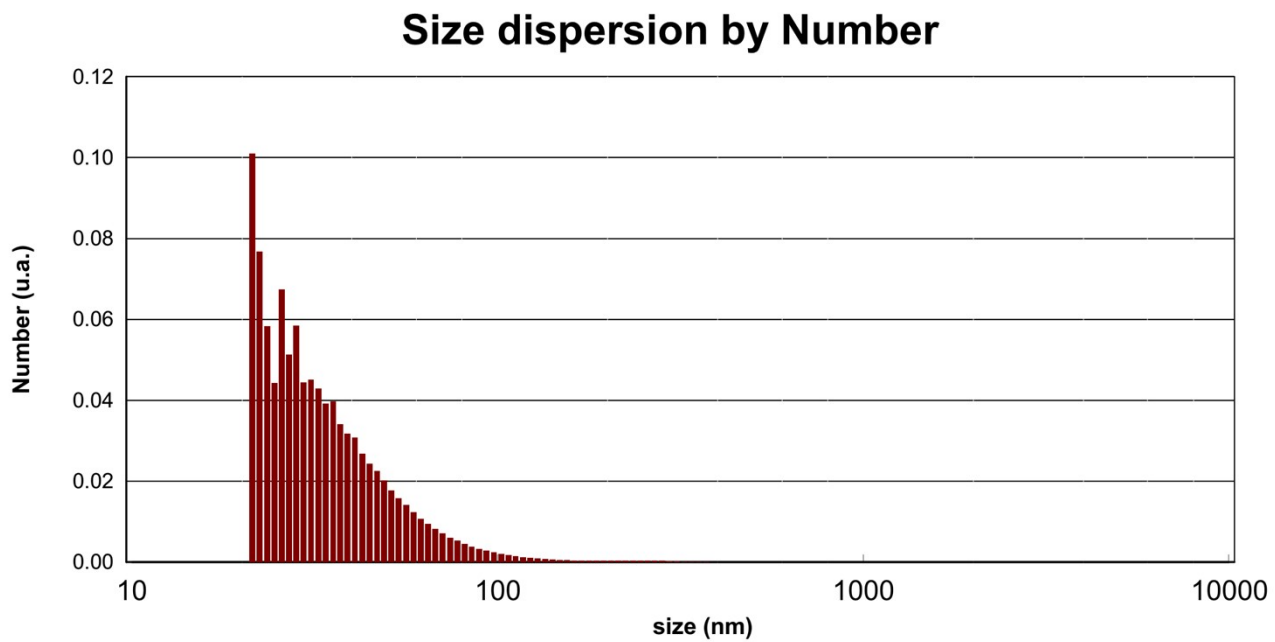

**Figure S1.** The particle size distribution diagram of  $\text{Fe}_3\text{O}_4@\text{MOF}$

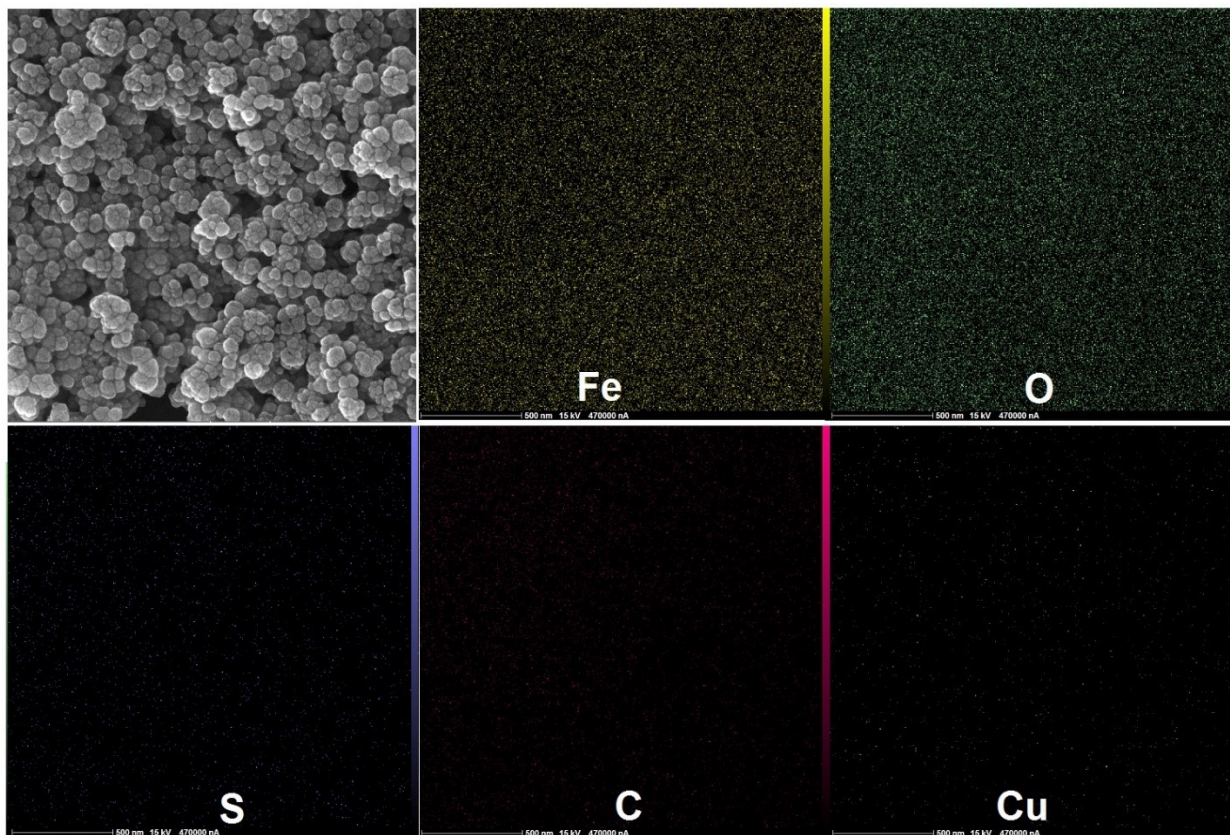

**Figure S2.** Elemental mapping of  $\text{Fe}_3\text{O}_4@\text{MOF}$

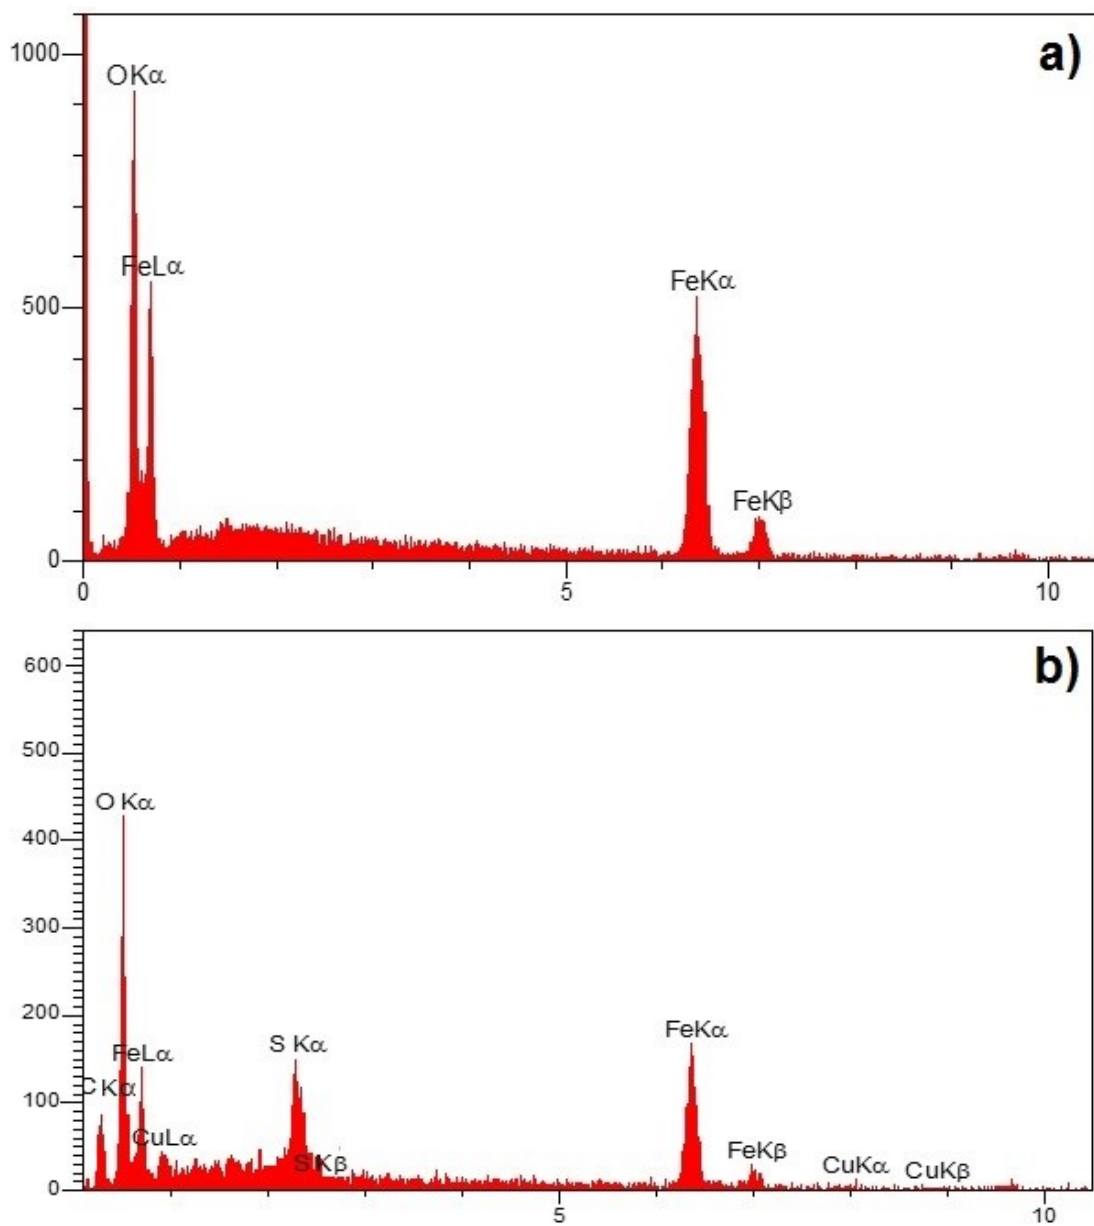

**Figure S3.** EDX patterns of (a)  $\text{Fe}_3\text{O}_4$  and (b)  $\text{Fe}_3\text{O}_4@\text{MOF}$

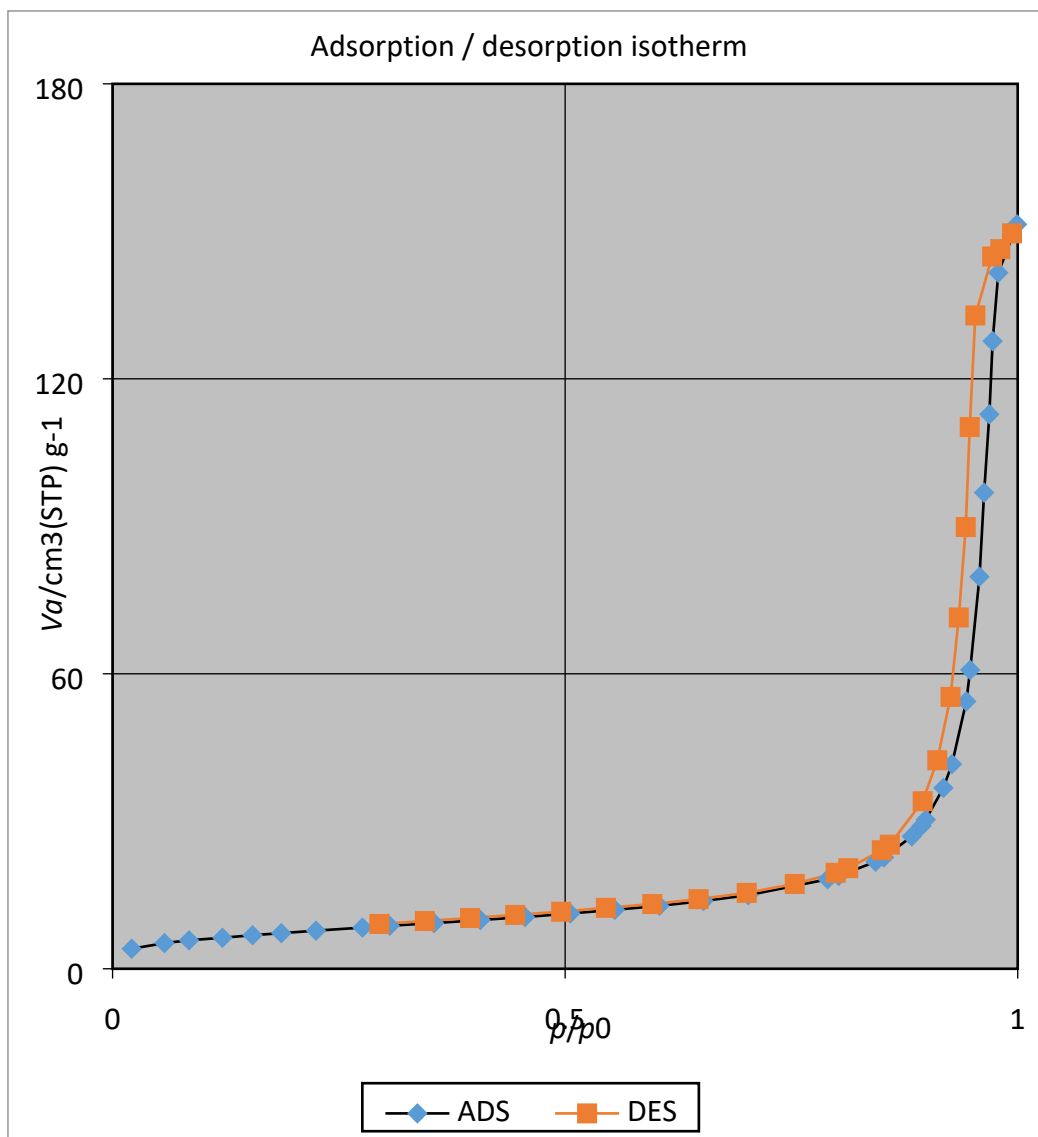

**Figure S4.** Nitrogen adsorption-desorption isotherms of bare  $\text{Fe}_3\text{O}_4$

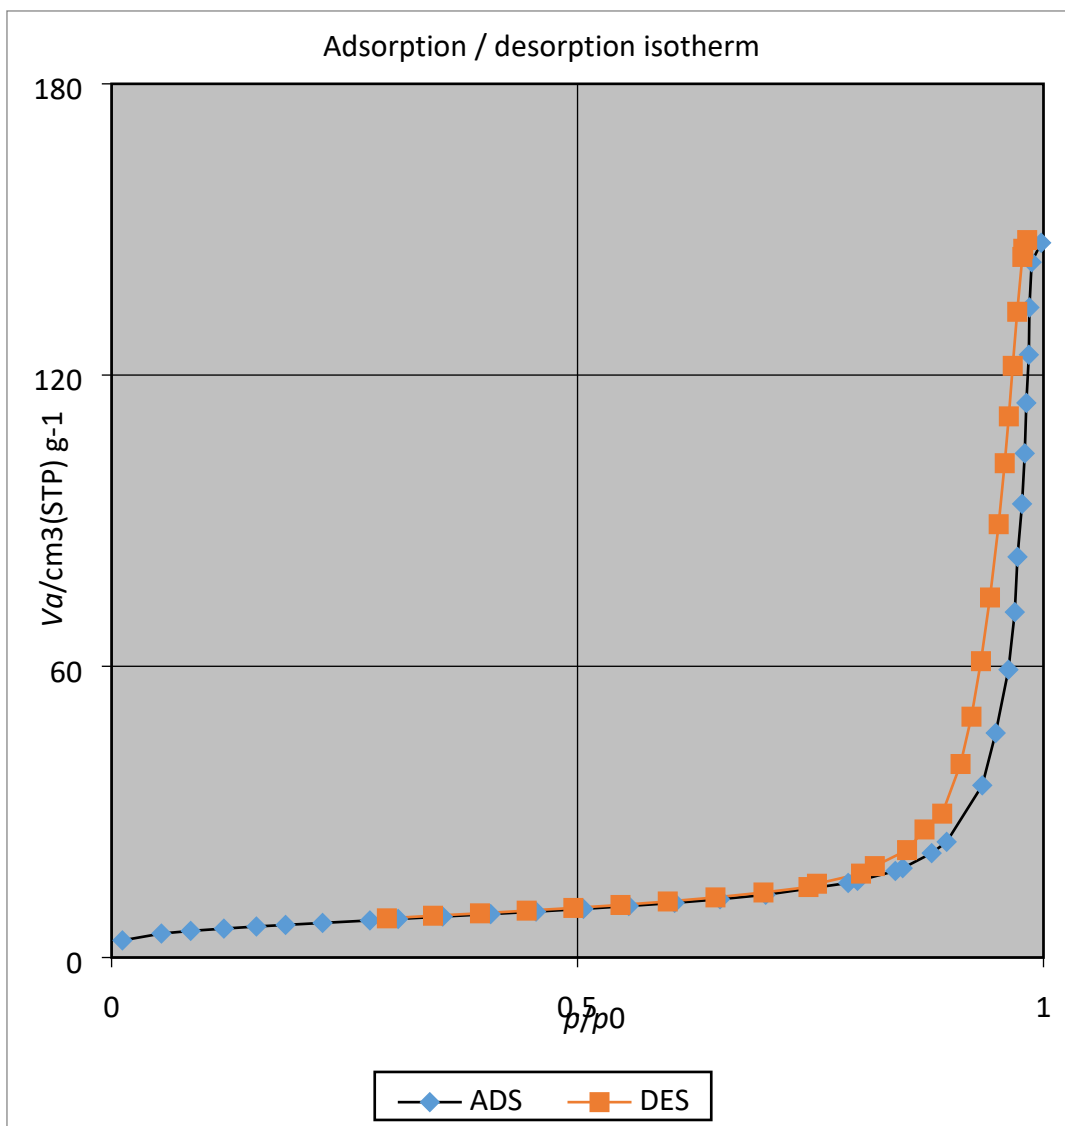

**Figure S5.** Nitrogen adsorption-desorption isotherms of Fe<sub>3</sub>O<sub>4</sub>@HKUST-1

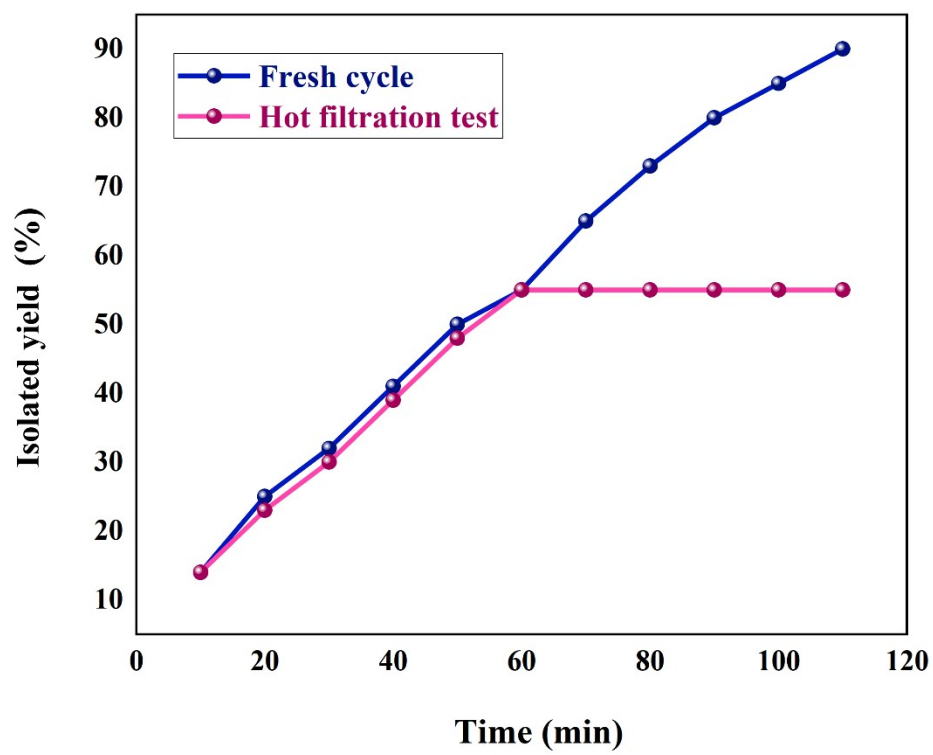

Figure S6. Hot filtration text diagram

**4-(1,3-Diphenylprop-2-yn-1-yl)morpholine (Table 2, entry 1)**

<sup>1</sup>H-NMR (300 MHz, CDCl<sub>3</sub>): δ= 2.69 (4H, t, *J*= 4.35), 3.76–3.80 (4H, m), 4.85 (1H, s), 7.35–7.42 (6H, m), 7.44–7.54 (2H, m), 7.69 (2H, d, *J*= 7.2); <sup>13</sup>C-NMR (CDCl<sub>3</sub>, 75 Hz): δ= 49.89, 62.06, 67.15, 85.01, 88.55, 122.98, 128.27, 128.30, 128.34, 128.65, 131.84, 137.74; M.S. (70 ev) *m/z* (%): 277 (M<sup>+</sup>, 100).

**4-(1-(4-Methoxyphenyl)-3-phenylprop-2-yn-1-yl)morpholine (Table 2, entry 2)**

<sup>1</sup>H-NMR (300 MHz, CDCl<sub>3</sub>): δ= 1.36 (4H, m), 2.73 (4H, m), 3.66 (3H, m), 4.86 (1H, s, *J*= 8.7), 6.93–6.96 (2H, m, *J*= 6.3), 7.37–7.39 (3H, m, *J*= 8.2), 7.55–7.57 (4H, m); <sup>13</sup>C-NMR (CDCl<sub>3</sub>, 75 Hz): δ= 49.76, 55.33, 61.60, 66.96, 84.60, 88.36, 113.71, 122.02, 127.76, 128.36, 130.02, 131.84, 159.47; M.S. (70 ev) *m/z* (%): 307 (M<sup>+</sup>, 100).

**4-(3-phenyl-1-(*p*-tolyl)prop-2-yn-1-yl)morpholine (Table 2, entry 5)**

<sup>1</sup>H-NMR (300 MHz, CDCl<sub>3</sub>): δ= 2.29 (3H, s), 2.57–2.62 (4H, t, *J*= 4.3 Hz), 3.66–3.70 (4H, m), 4.72 (1H, s), 7.09 (2H, d, *J*= 7.9 Hz), 7.12 (2H, d, *J*= 7.3 Hz), 7.43–7.26 (5H, m); <sup>13</sup>C-NMR (CDCl<sub>3</sub>, 75 Hz): δ= 21.16, 49.84, 61.84, 67.03, 83.67, 88.33, 123.16, 128.21, 128.33, 128.66, 128.99, 131.84, 137.81; M.S. (70 ev) *m/z* (%): 291 (M<sup>+</sup>, 100).

**1-(1,3-Diphenylprop-2-yn-1-yl)piperidine (Table 2, entry 6)**

<sup>1</sup>H-NMR (300 MHz, CDCl<sub>3</sub>): δ= 1.49–1.66 (2H, m), 1.68–1.72 (4H, m), 2.67 (4H, t, *J*= 5.25), 4.89 (1H, s), 7.35–7.57 (6H, m), 7.58–7.69 (2H, m), 7.71–7.72 (2H, m); <sup>13</sup>C-NMR (CDCl<sub>3</sub>, 75 Hz): δ= 24.44, 26.13, 50.69, 62.38, 86.02, 87.95, 123.34, 127.57, 128.13, 128.33, 128.66, 131.86, 138.42.

**1-(1-(phenylethynyl)cyclohexyl)piperidine (Table 2, entry 12)**

<sup>1</sup>H-NMR (300 MHz, CDCl<sub>3</sub>): δ= 1.42–1.63 (12H, m), 2.17–2.19 (4H, m), 3.30 (4H, t, *J*= 4.8 Hz), 7.24–7.29 (3H, m, *J*= 4.8 Hz), 7.43–7.47 (2H, m); <sup>13</sup>C-NMR (CDCl<sub>3</sub>, 75 Hz): δ= 23.12, 23.49, 24.55, 25.27, 33.38, 47.69, 73.96, 81.59, 87.48, 121.79, 128.48, 129.26, 132.51; M.S. (70 ev) *m/z* (%): 267 (M<sup>+</sup>, 100).



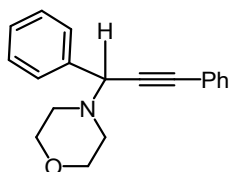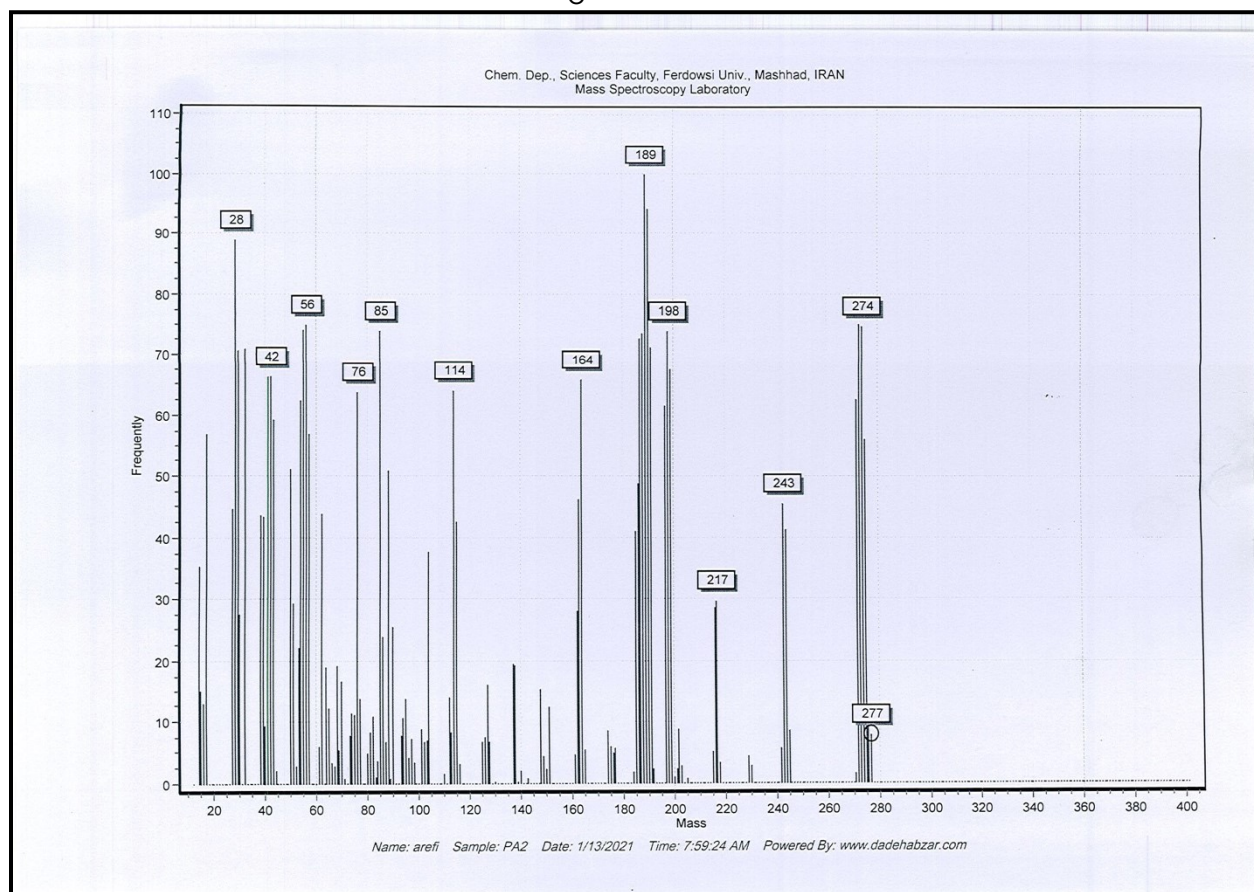

Mass spectrum of 4-(1,3-Diphenylprop-2-yn-1-yl)morpholine (Table 2, entry 1)

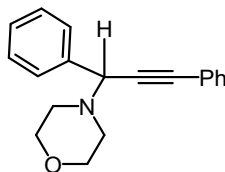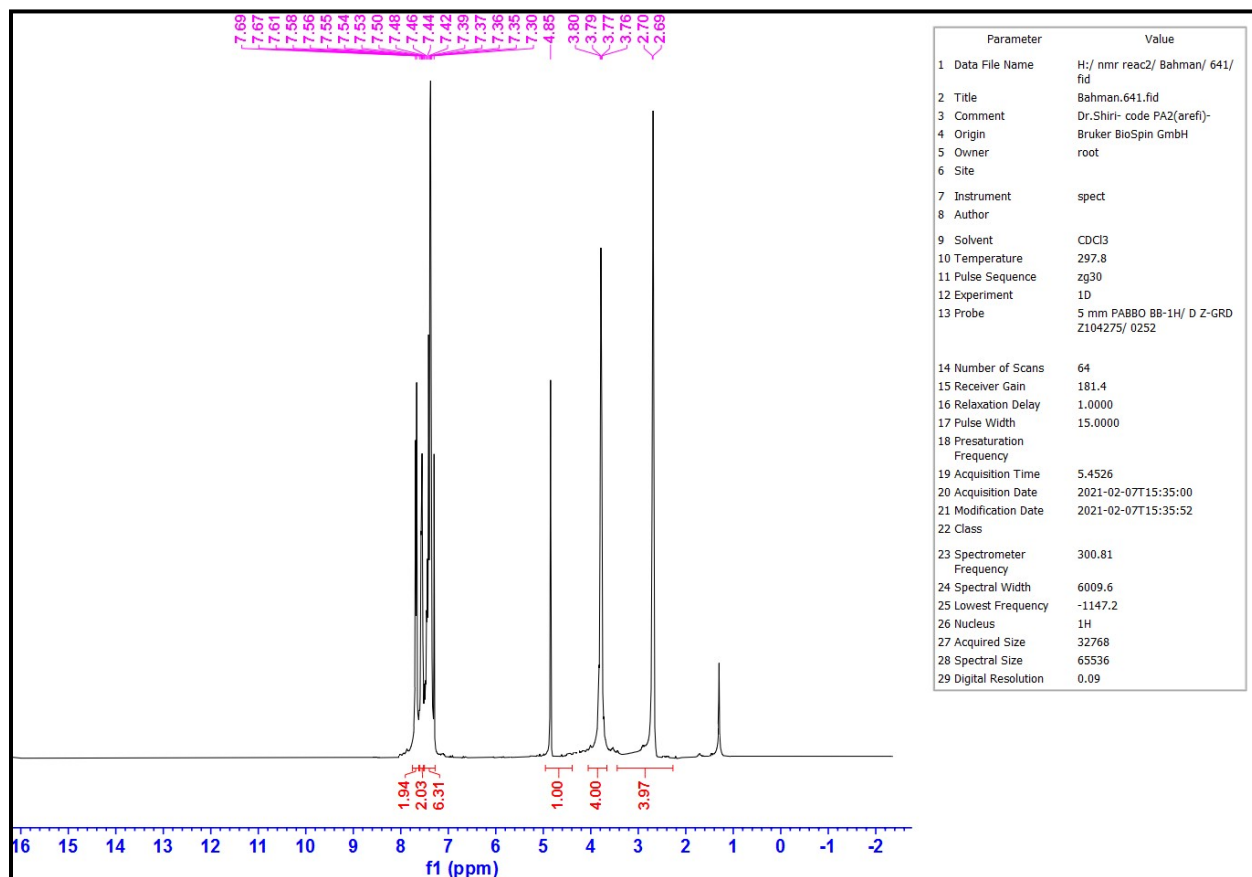

$^1\text{H-NMR}$  of 4-(1,3-Diphenylprop-2-yn-1-yl)morpholine (Table 2, entry 1)

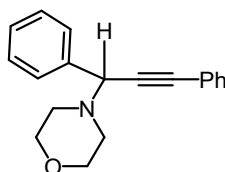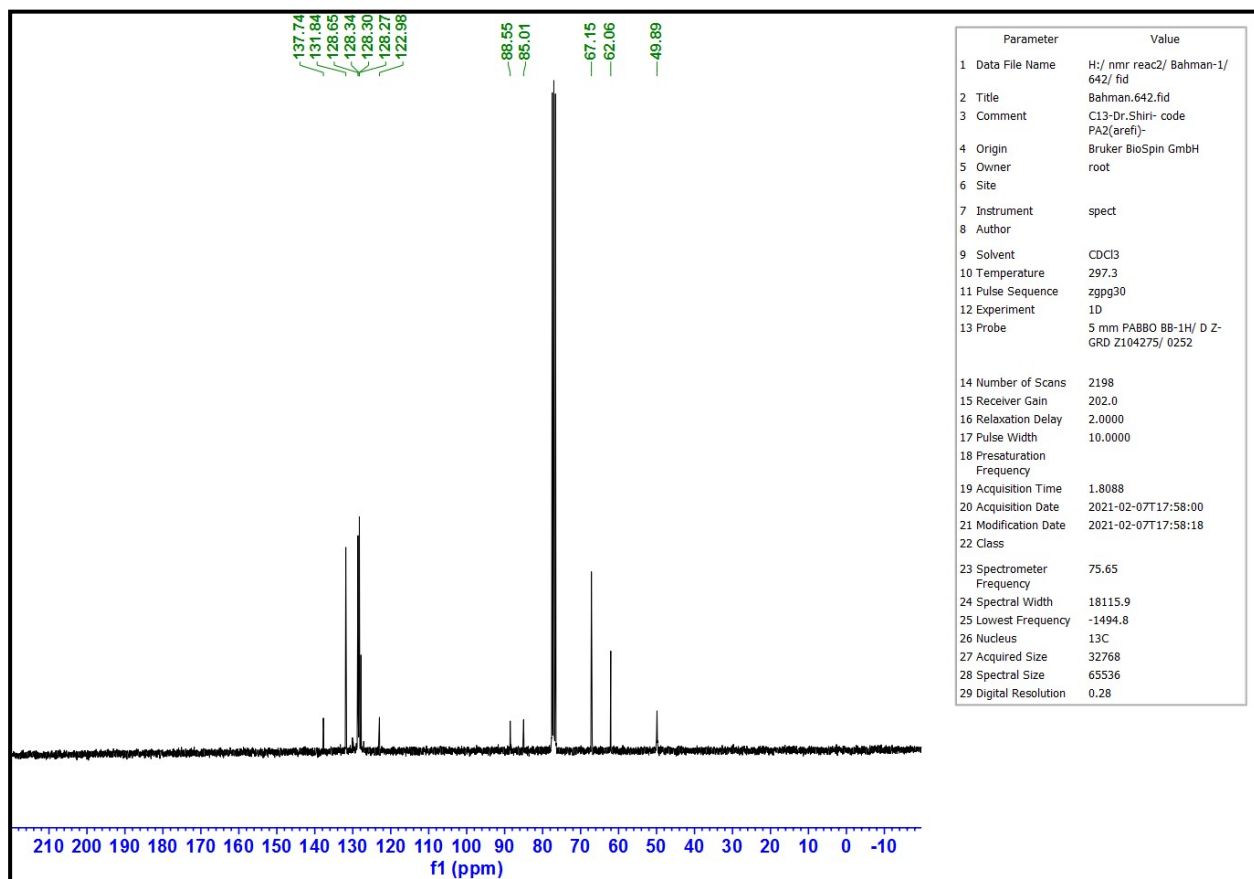

$^{13}\text{C}$ -NMR of 4-(1,3-Diphenylprop-2-yn-1-yl)morpholine (Table 2, entry 1)

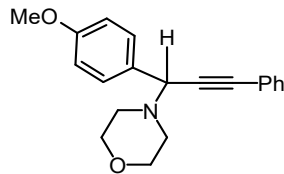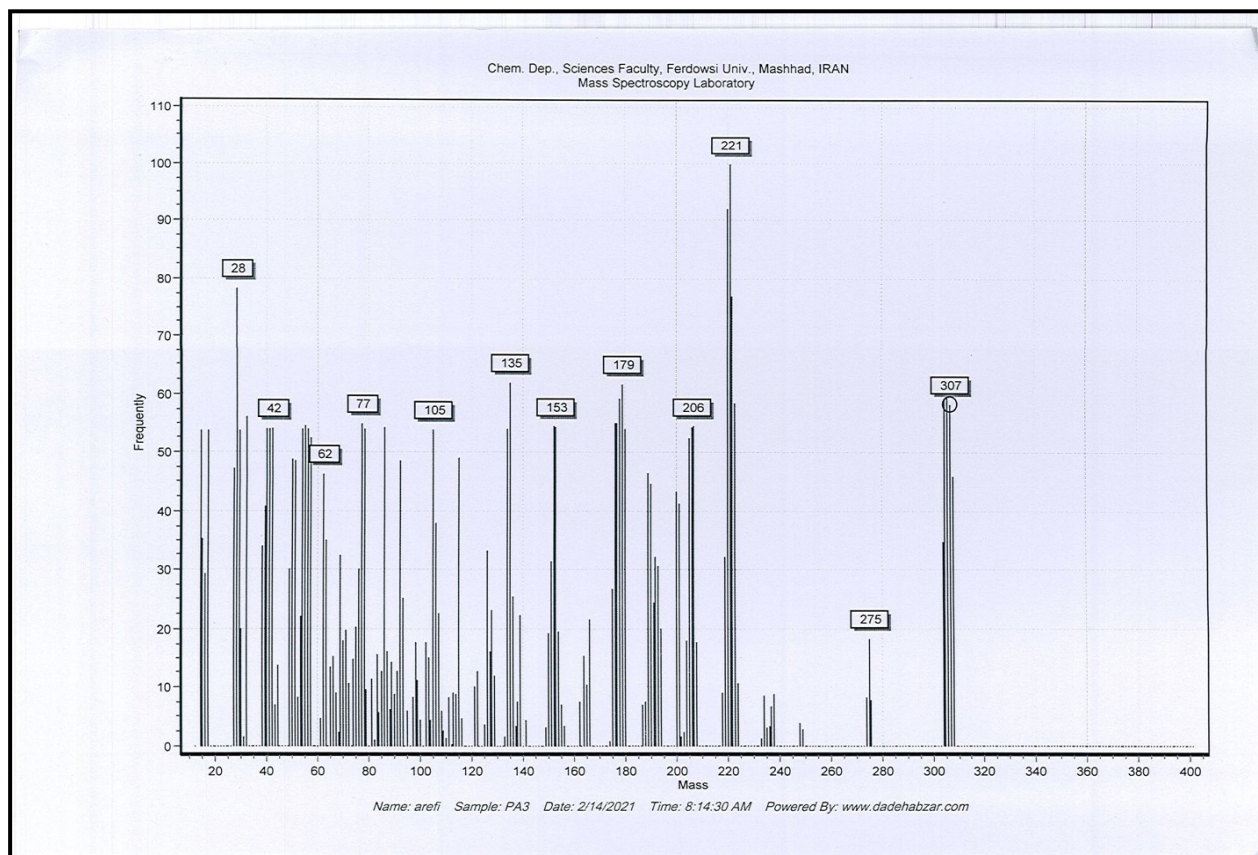

Mass spectrum of 4-(1-(4-Methoxyphenyl)-3-phenylprop-2-yn-1-yl) morpholine (Table 2, entry 2)

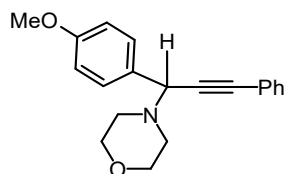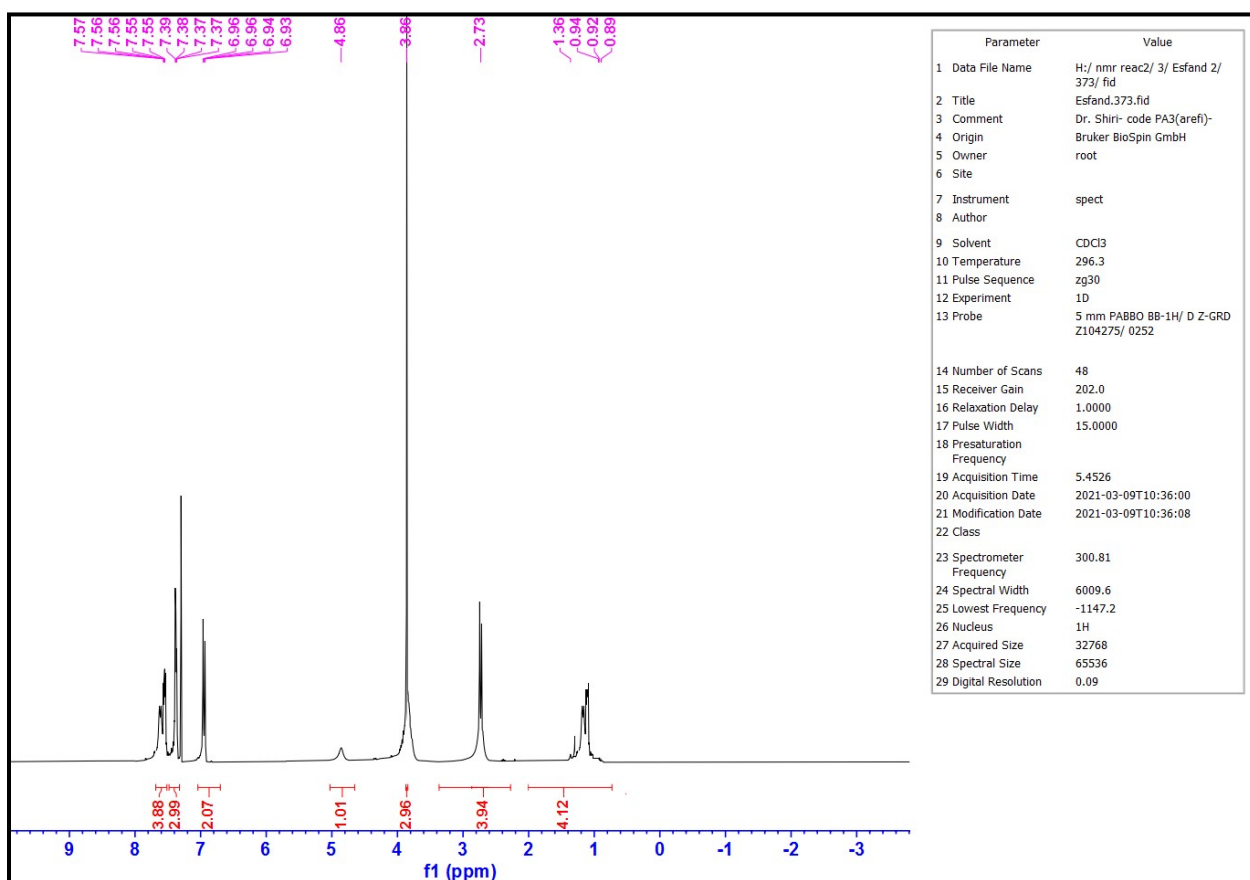

| Parameter                  | Value                                   |
|----------------------------|-----------------------------------------|
| 1 Data File Name           | H:/ nmr reac2/ 3/ Esfond 2/ 373/ fid    |
| 2 Title                    | Esfond.373.fid                          |
| 3 Comment                  | Dr. Shiri- code PA3(arefi)-             |
| 4 Origin                   | Bruker BioSpin GmbH                     |
| 5 Owner                    | root                                    |
| 6 Site                     |                                         |
| 7 Instrument               | spect                                   |
| 8 Author                   |                                         |
| 9 Solvent                  | CDCl3                                   |
| 10 Temperature             | 296.3                                   |
| 11 Pulse Sequence          | zg30                                    |
| 12 Experiment              | 1D                                      |
| 13 Probe                   | 5 mm PABBO BB-1H/ D Z-GRD Z104275/ 0252 |
| 14 Number of Scans         | 48                                      |
| 15 Receiver Gain           | 202.0                                   |
| 16 Relaxation Delay        | 1.0000                                  |
| 17 Pulse Width             | 15.0000                                 |
| 18 Presaturation Frequency |                                         |
| 19 Acquisition Time        | 5.4526                                  |
| 20 Acquisition Date        | 2021-03-09T10:36:00                     |
| 21 Modification Date       | 2021-03-09T10:36:08                     |
| 22 Class                   |                                         |
| 23 Spectrometer Frequency  | 300.81                                  |
| 24 Spectral Width          | 6009.6                                  |
| 25 Lowest Frequency        | -1147.2                                 |
| 26 Nucleus                 | 1H                                      |
| 27 Acquired Size           | 32768                                   |
| 28 Spectral Size           | 65536                                   |
| 29 Digital Resolution      | 0.09                                    |

<sup>1</sup>H NMR of 4-(1-(4-Methoxyphenyl)-3-phenylprop-2-yn-1-yl)morpholine (Table 2, entry 2)

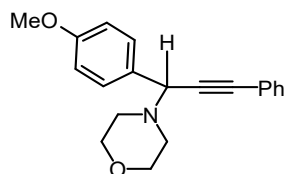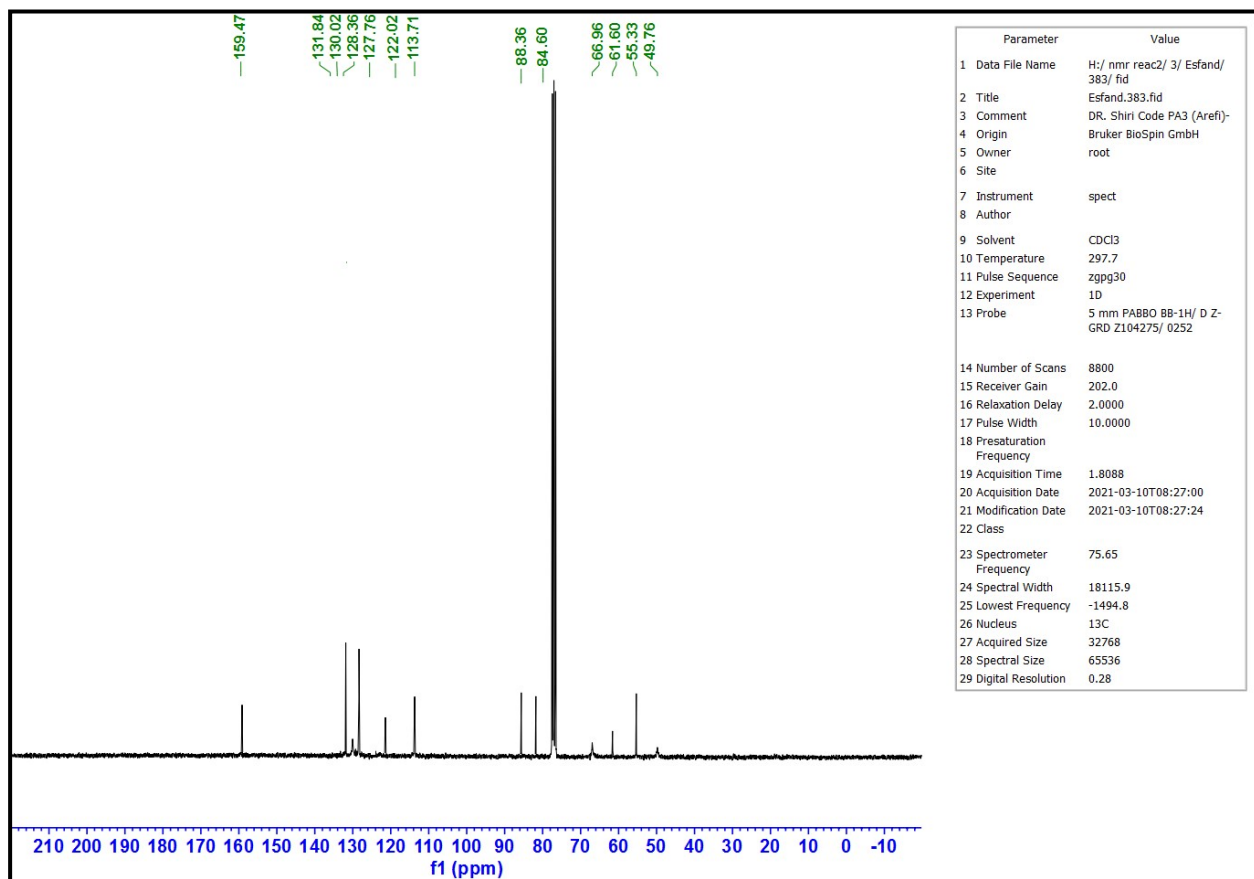

$^{13}\text{C}$ -NMR of 4-(1-(4-Methoxyphenyl)-3-phenylprop-2-yn-1-yl) morpholine (Table 2, entry 2)

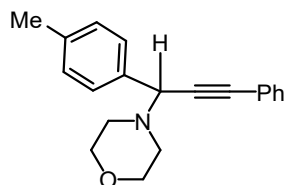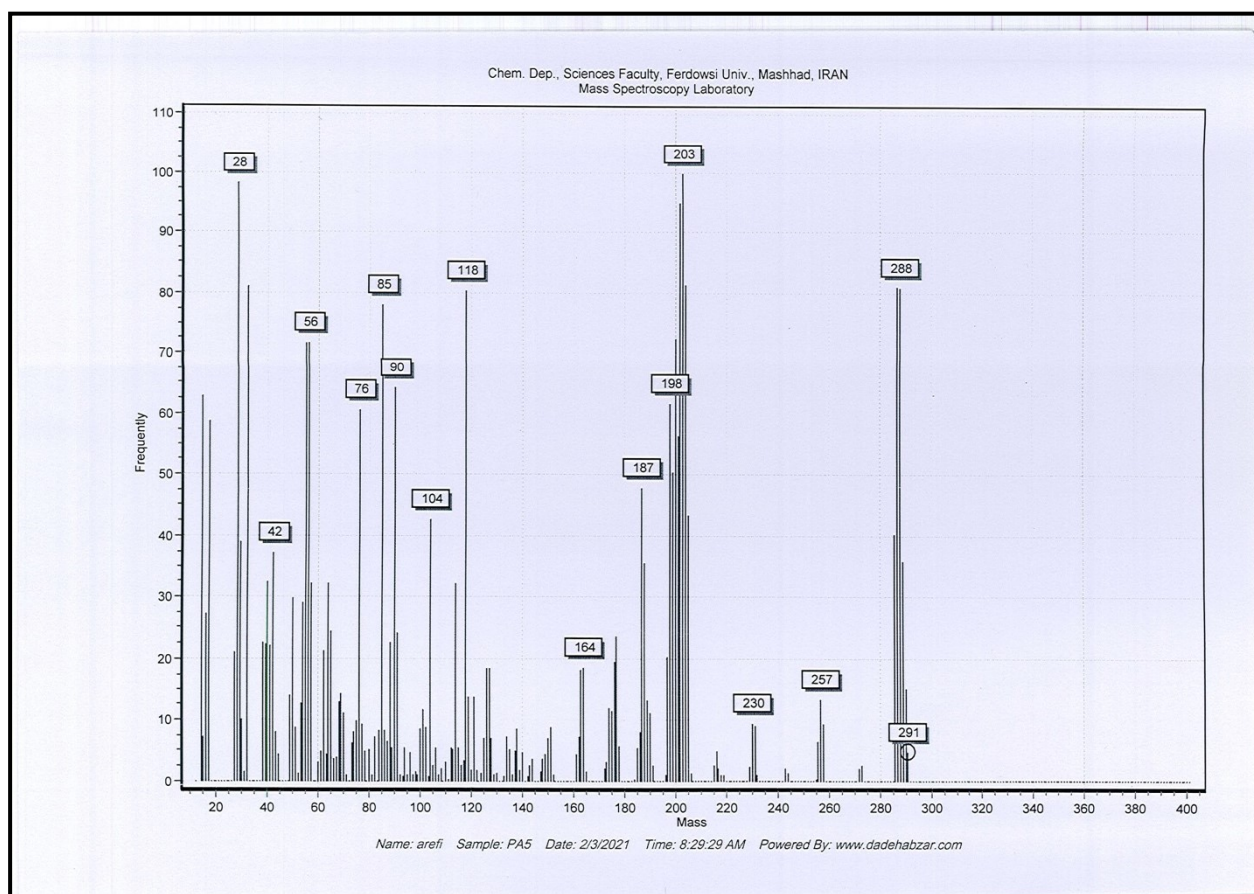

Mass spectrum of 4-(3-phenyl-1-(p-tolyl)prop-2-yn-1-yl)morpholine (Table 2, entry 5)

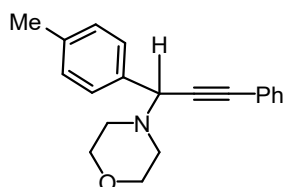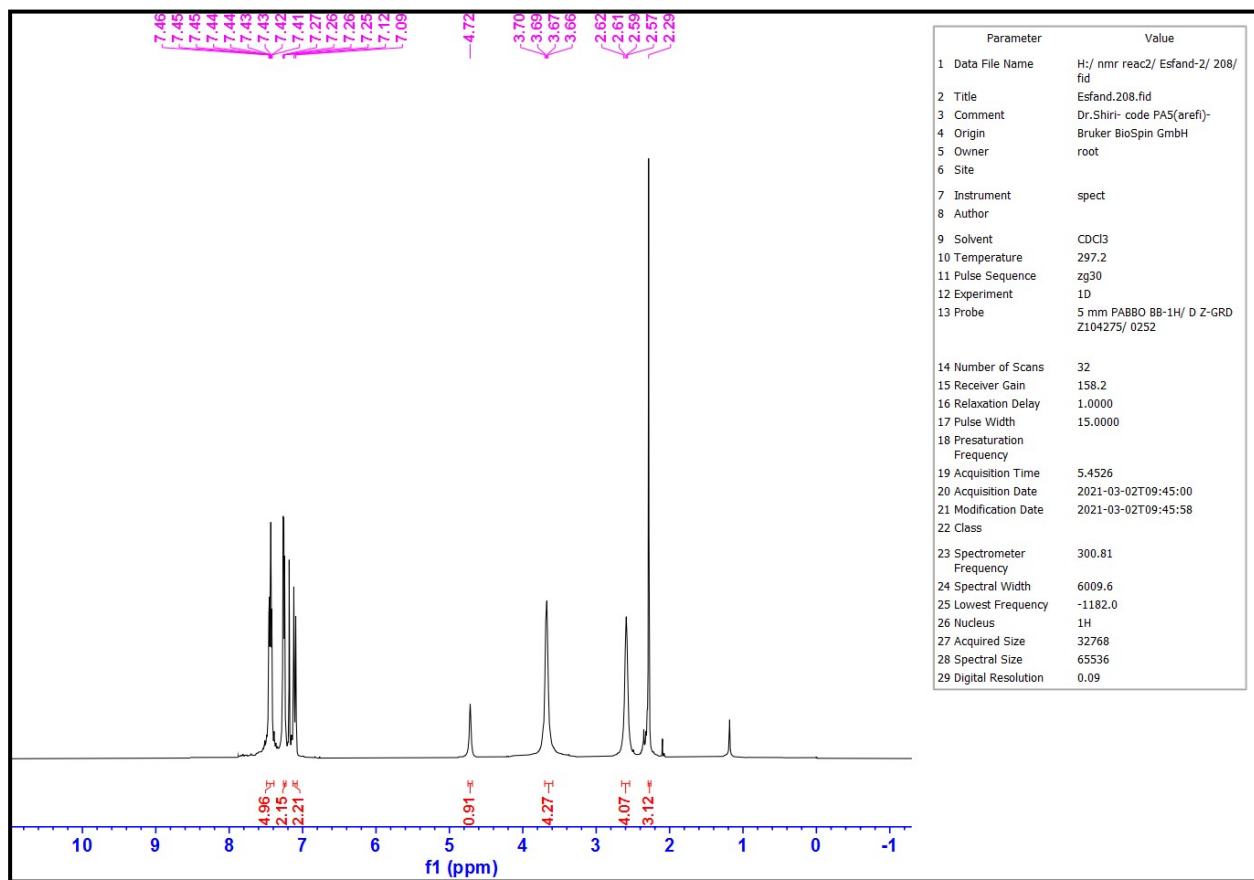

<sup>1</sup>H-NMR of 4-(3-phenyl-1-(p-tolyl)prop-2-yn-1-yl)morpholine (Table 2, entry 5)



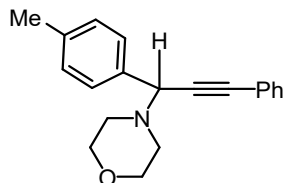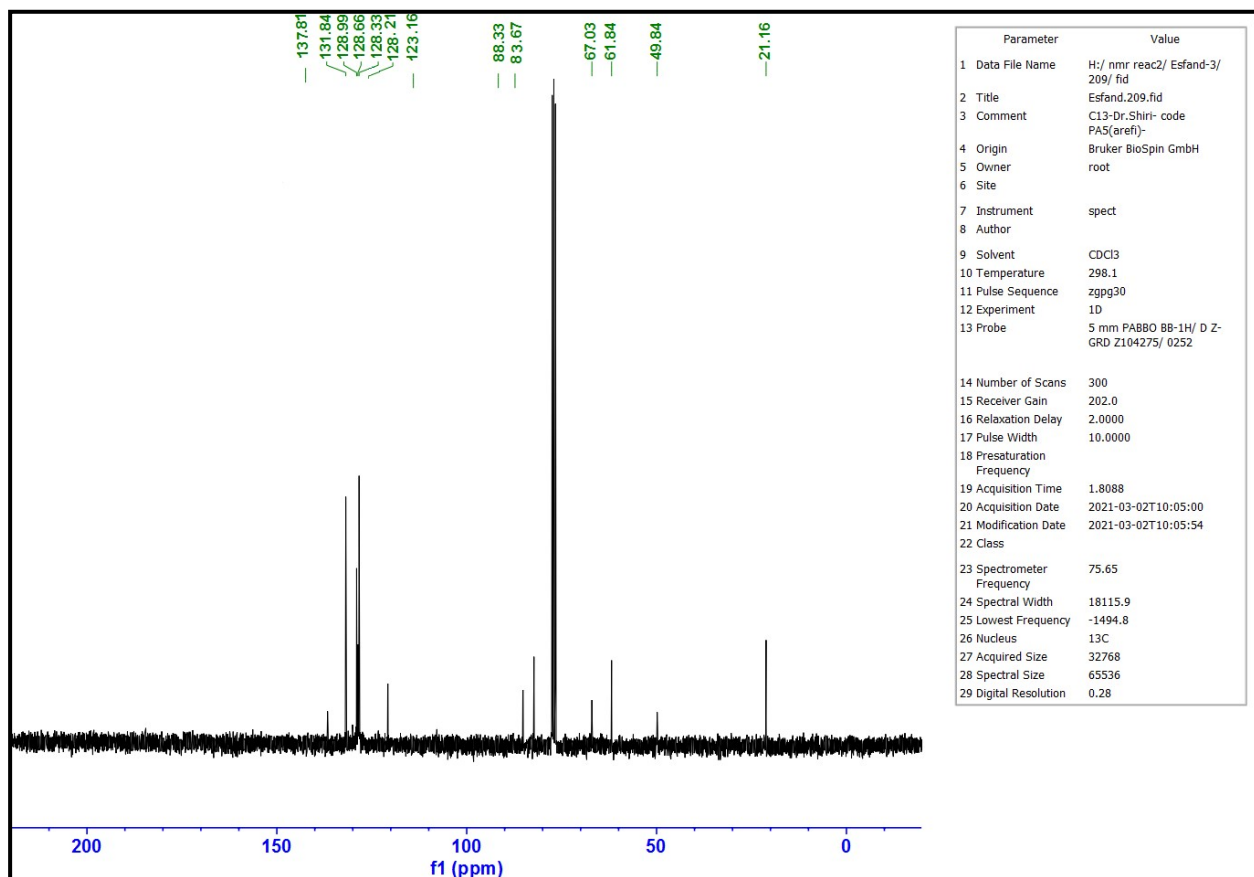

$^{13}\text{C}$ -NMR of 4-(3-phenyl-1-(*p*-tolyl)prop-2-yn-1-yl)morpholine (Table 2, entry 5)

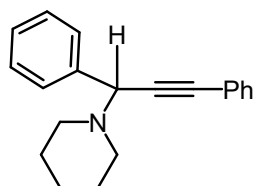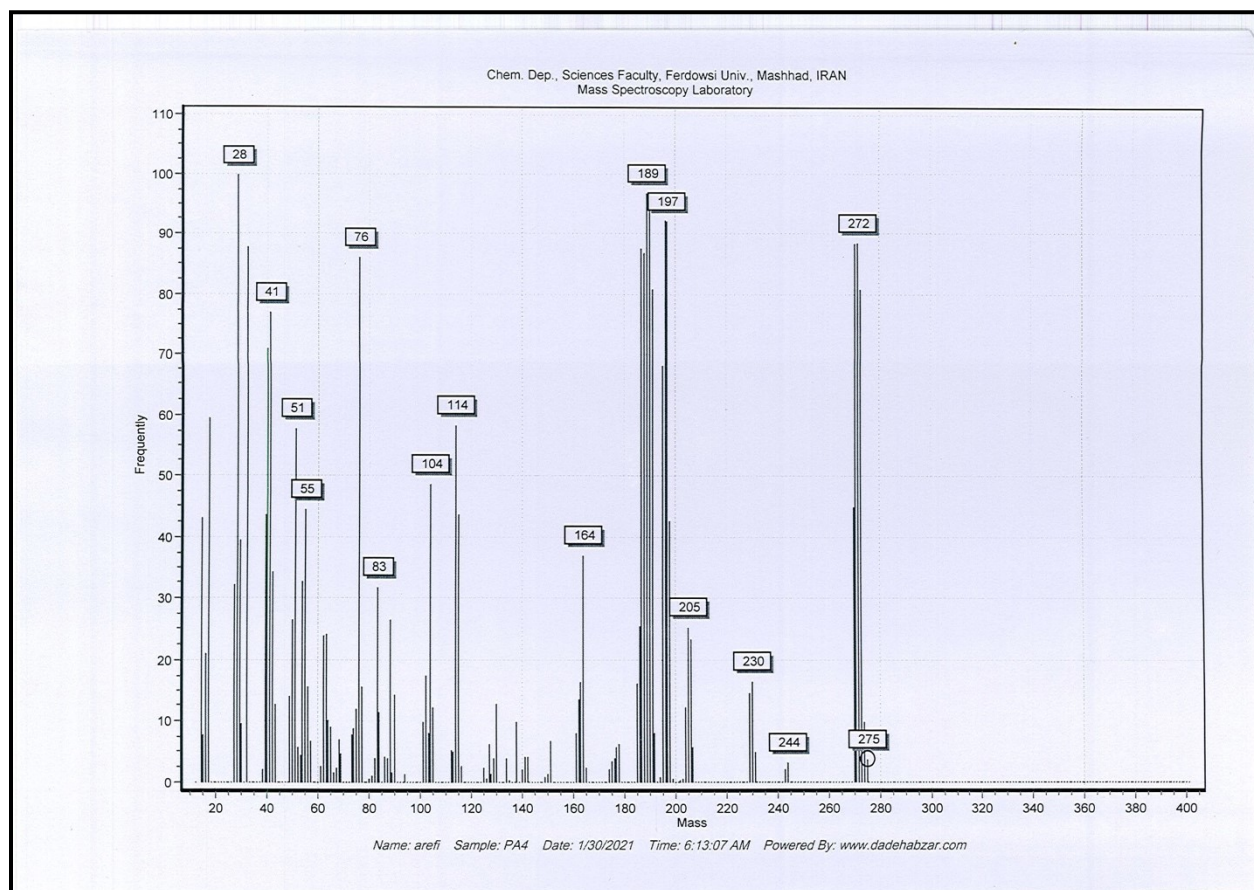

Mass spectrum of 1-(1,3-Diphenylprop-2-yn-1-yl) piperidine (Table 2, entry 6)

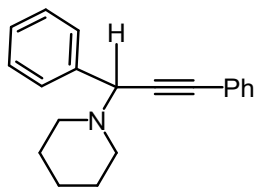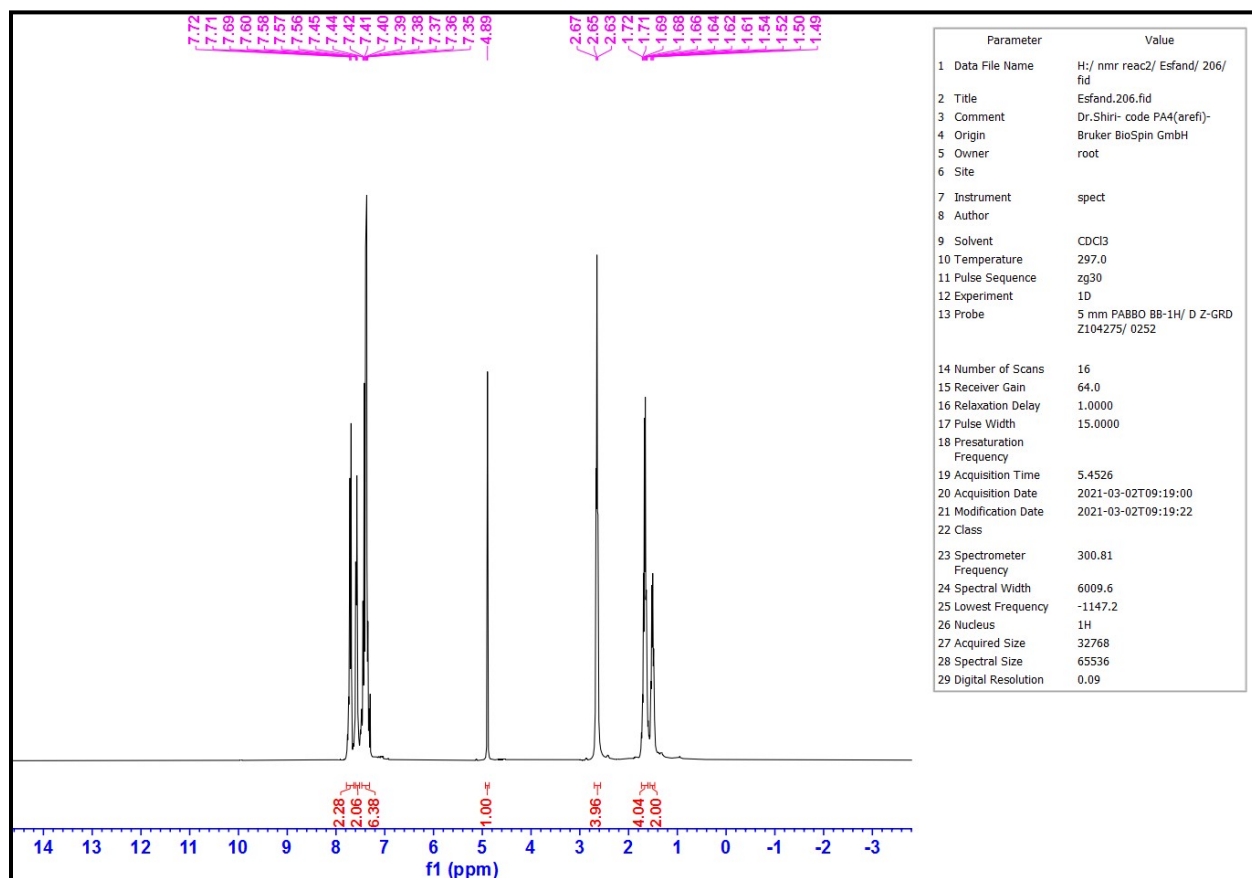

$^1\text{H-NMR}$  of 1-(1,3-Diphenylprop-2-yn-1-yl) piperidine (Table 2, entry 6)

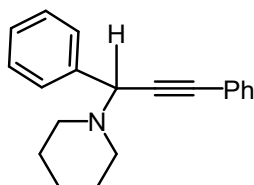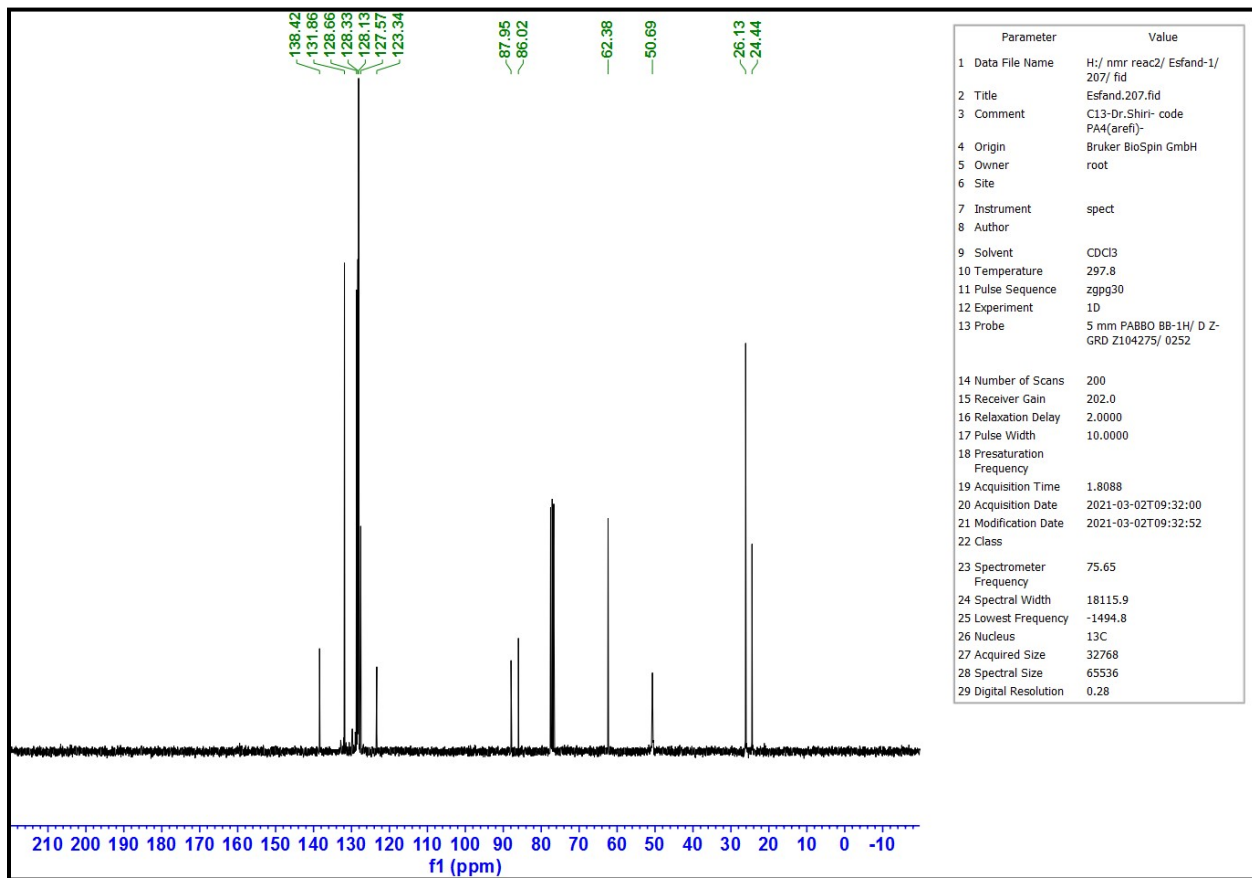

$^{13}\text{C}$ -NMR of 1-(1,3-Diphenylprop-2-yn-1-yl) piperidine (Table 2, entry 6)

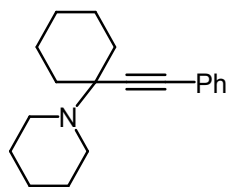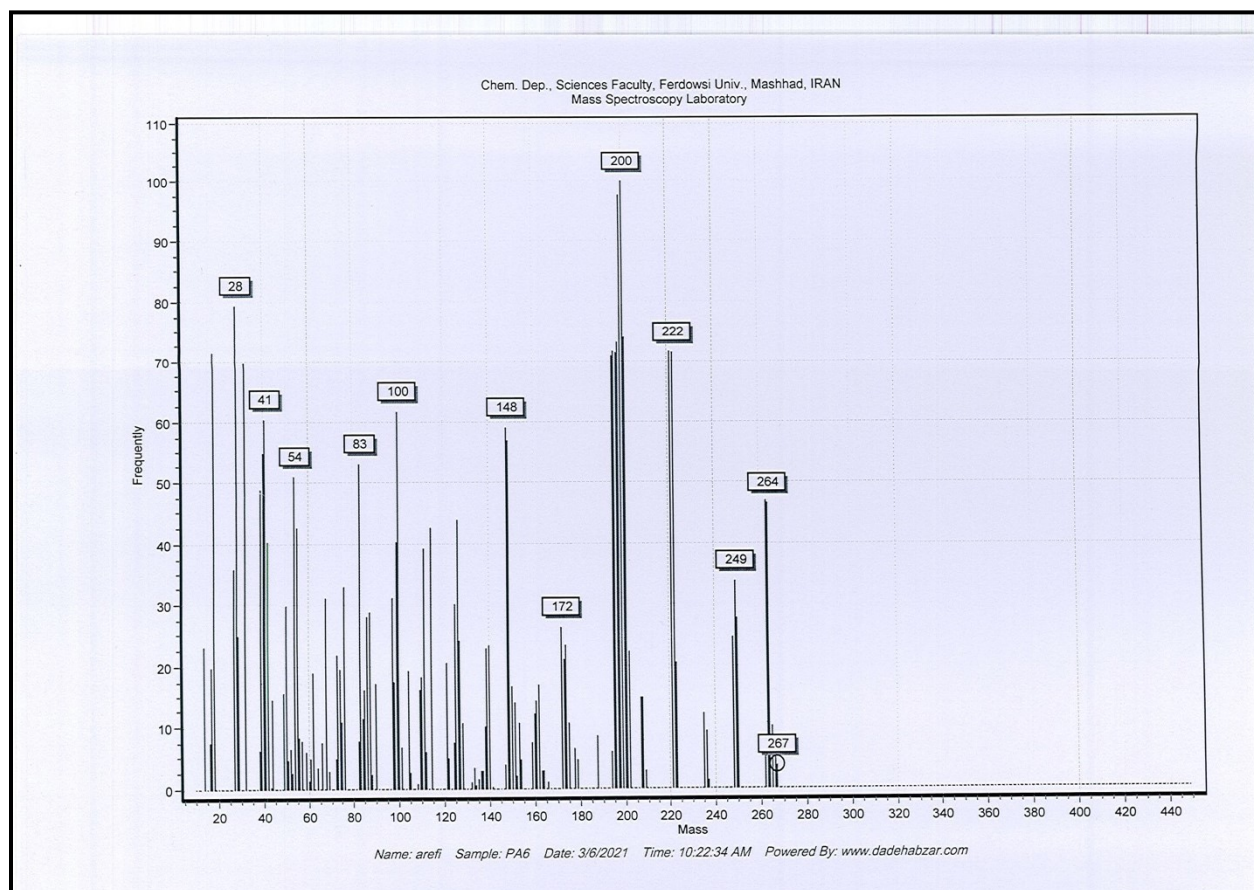

Mass spectrum of 1-(1-(phenylethynyl)cyclohexyl)piperidine (Table 2, entry 12)

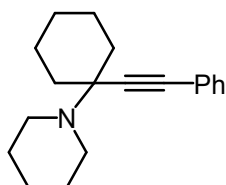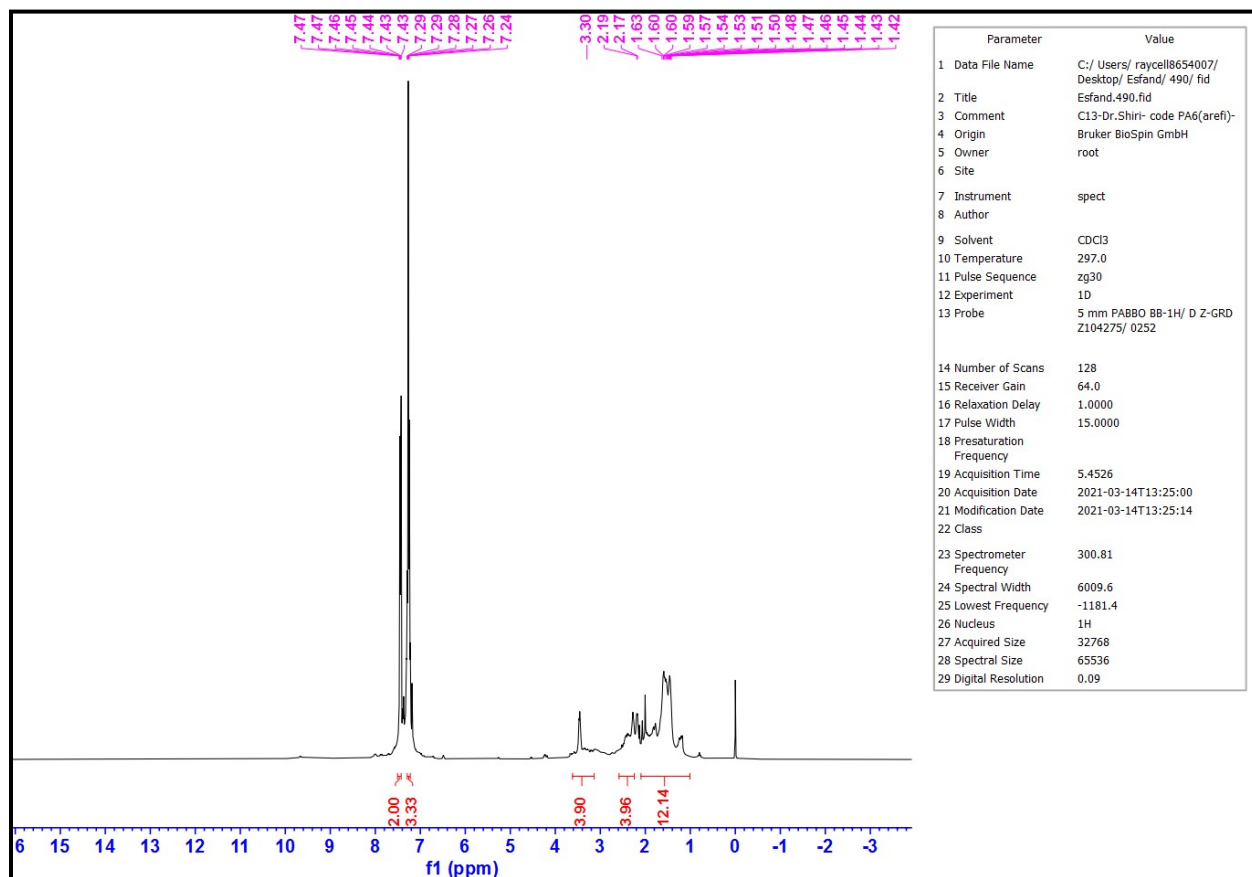

<sup>1</sup>H-NMR of 1-(1-(phenylethynyl)cyclohexyl)piperidine (Table 2, entry 12)

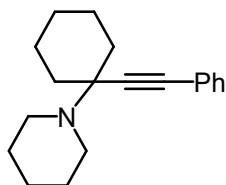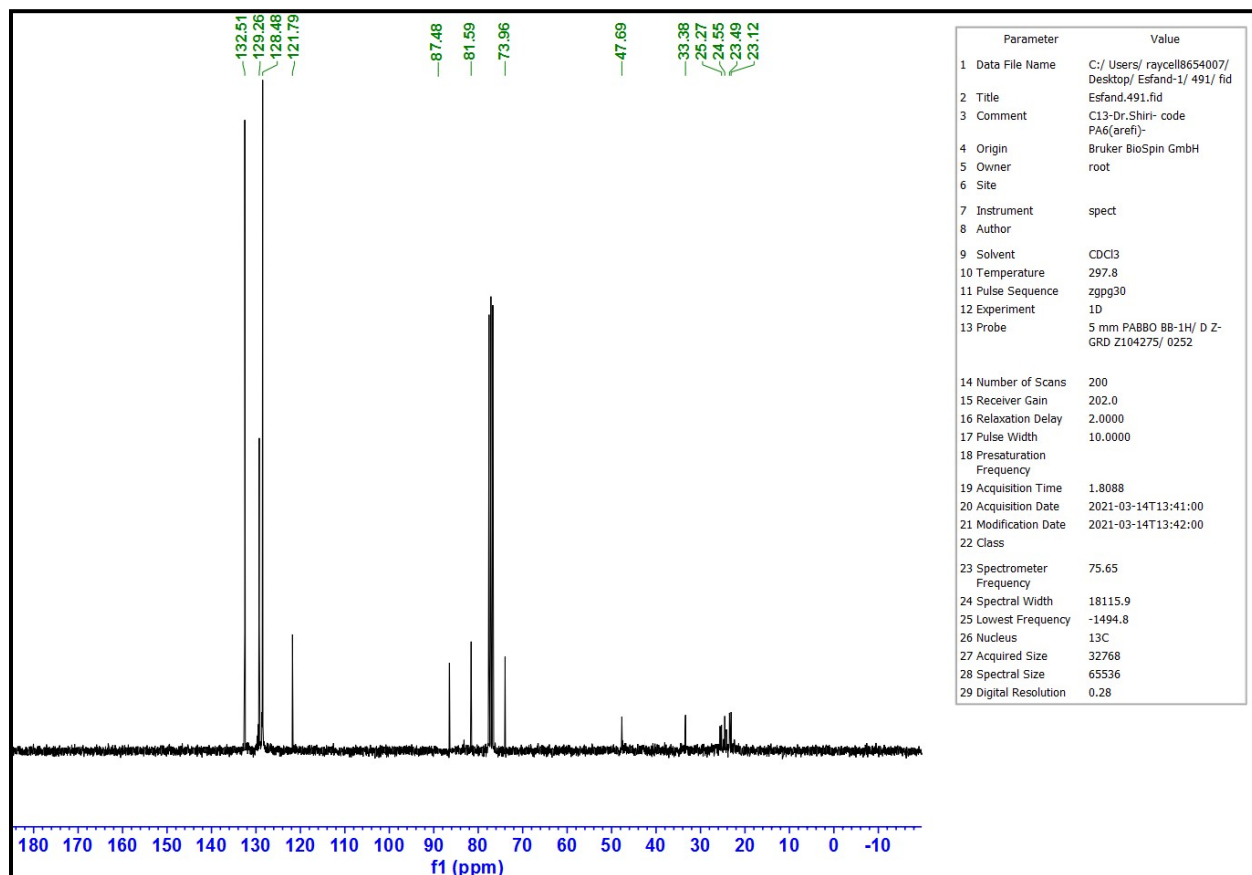

$^{13}\text{C}$ -NMR of 1-(1-(phenylethynyl)cyclohexyl)piperidine (Table 2, entry 12)
